# Supplementary material for: pH/redox dual-stimuli-responsive cross-linked polyphosphazene nanoparticles for multimodal imaging-guided chemo-photodynamic therapy
Source: Royal Society of Chemistry journal article supplement (doi:10.1039/c9nr01194c), 2019-01-01
Supplement: c9nr01194c1.pdf [file c9nr01194c1.pdf]

**pH/redox dual-stimuli responsive cross-linked  
polyphosphazene nanoparticles for multimodal imaging  
guided chemo-photodynamic therapy**

Xunan Jing,<sup>a</sup> Zhe Zhi,<sup>b</sup> Liming Jin,<sup>a</sup> Fei Wang,<sup>a</sup> Youshen Wu,<sup>a</sup> Daquan Wang,<sup>a</sup> Kai Yan,<sup>a</sup>

Yongping Shao,<sup>b</sup> and Lingjie Meng \*<sup>a, c</sup>

<sup>a</sup> School of Science, MOE Key Laboratory for Nonequilibrium Synthesis and Modulation of Condensed Matter; Xi'an Key Laboratory of Sustainable Energy Material Chemistry, Xi'an Jiaotong University, Xi'an 710049, P. R. China

<sup>b</sup> Center for Mitochondrial Biology and Medicine, Ministry of Education Key; Laboratory of Biomedical Information Engineering, School of Life Science and Technology, Xi'an Jiaotong University, Xi'an 710049, P. R. China

<sup>c</sup> Instrumental Analysis Center of Xi'an Jiaotong University, Xi'an 710049, P. R. China

\* Corresponding author, Email: menglingjie@mail.xjtu.edu.cn (L. Meng)

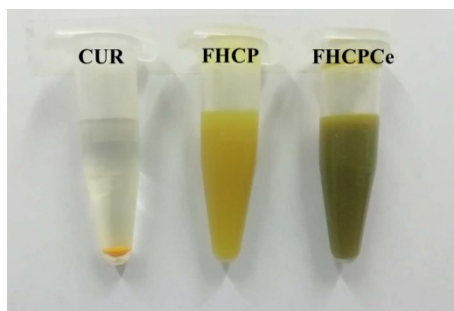

**Figure S1.** The photograph of free CUR, FHCP NPs and FHCPCe NPs suspended in water (concentration =  $1\text{mg}\cdot\text{mL}^{-1}$ ).

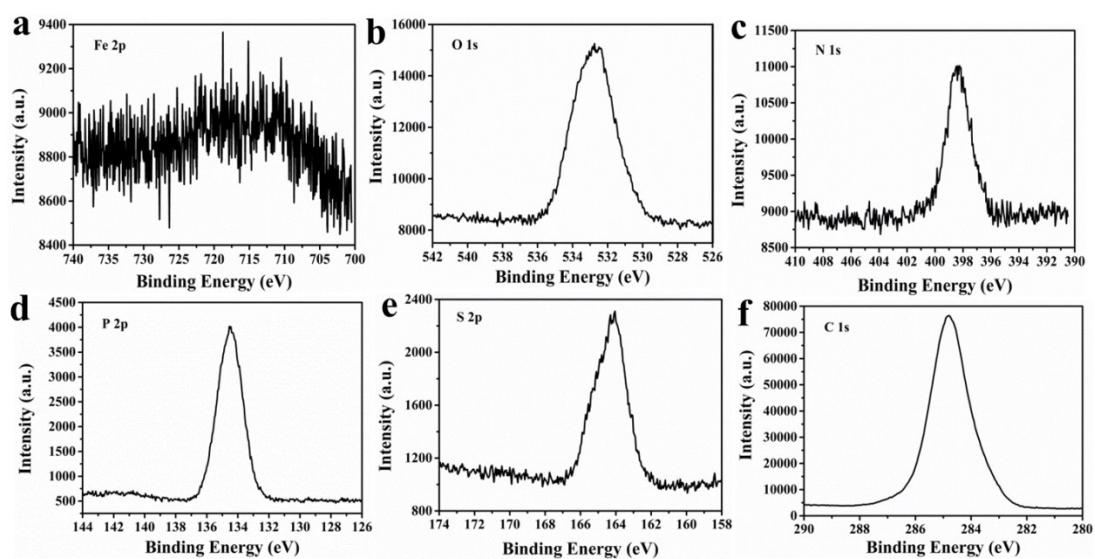

**Figure S2.** XPS spectrum of FHCPCe NPs: (a) Fe, (b) O, (c) N, (d) P, (e) S and (f) C elements, together with their corresponding fitting curves.

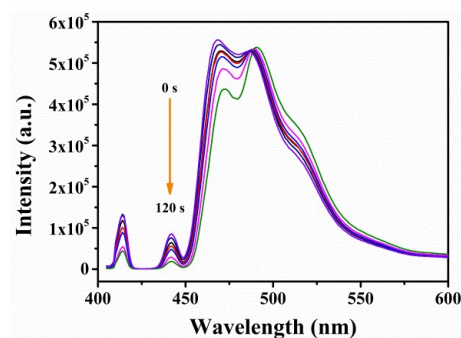

**Figure S3.** Fluorescence emission spectra of DMA solution in the presence of FHCPe NPs with the increase of laser irradiation time.

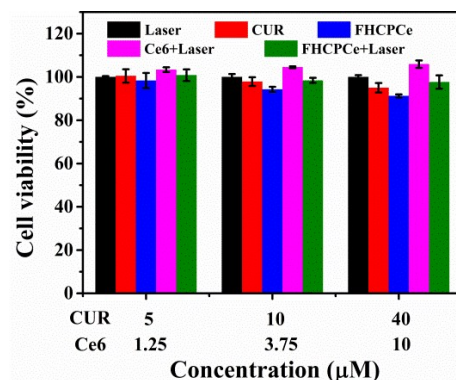

**Figure S4.** Cell viability of LO2 treated with PBS+Laser, free CUR, free Ce6+Laser, FHCPe and FHCPe+Laser at different concentrations for 48 h.

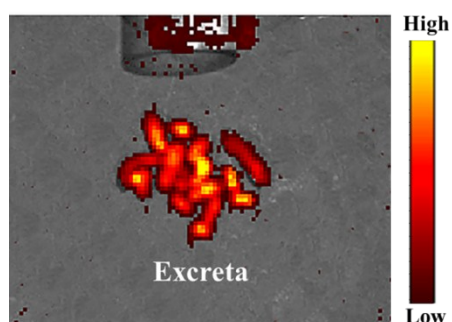

**Figure S5.** Fluorescence image of excreta tumor-bearing mice at 8h after being treated with FHCPe NPs via intravenous injection.
